# Supplementary material
Source: PubMed Central journal article supplement (PMC4124004)
Supplement: NIHMS243136-supplement-Supp_Tables2.pdf [file NIHMS243136-supplement-Supp_Tables2.pdf]

**Supplementary Table 2:** Protein identification in different culture conditions using mass spectrometry

**P4-hMSCs alone**

| N  | Unused | Total | %Cov        | %Cov(50)    | %Cov(95)    | Accession #  | Name of the protein                                             | Peptides(95%) |
|----|--------|-------|-------------|-------------|-------------|--------------|-----------------------------------------------------------------|---------------|
| 1  | 22.23  | 22.23 | 34.97854173 | 9.313304722 | 8.583690971 | gi 47132555  | fibronectin 1 isoform 4 preproprotein [Homo sapiens]            | 11            |
| 2  | 19.02  | 19.02 | 87.33528256 | 12.51830161 | 11.49341166 | gi 48762934  | alpha 2 type I collagen [Homo sapiens]                          | 11            |
| 3  | 17.89  | 17.89 | 79.91803288 | 12.36338764 | 12.36338764 | gi 110349772 | alpha 1 type I collagen preproprotein [Homo sapiens]            | 14            |
| 4  | 9.6    | 9.6   | 54.35139537 | 19.21182275 | 10.67323461 | gi 4502027   | albumin precursor [Homo sapiens]                                | 4             |
| 5  | 8      | 8     | 57.09219575 | 23.40425551 | 23.40425551 | gi 4504619   | insulin-like growth factor binding protein 7 [Homo sapiens]     | 4             |
| 7  | 4.08   | 4.08  | 58.04020166 | 9.296482056 | 9.296482056 | gi 24307907  | plasminogen activator inhibitor type 1, member 2 [Homo sapiens] | 2             |
| 8  | 3.92   | 3.92  | 19.06377226 | 2.578018978 | 1.967435516 | gi 66932947  | alpha-2-macroglobulin precursor [Homo sapiens]                  | 2             |
| 9  | 3.47   | 3.47  | 30.854702   | 2.991452999 | 1.025641058 | gi 40317626  | thrombospondin 1 precursor [Homo sapiens]                       | 1             |
| 10 | 3.4    | 3.4   | 25.30303001 | 4.696969688 | 4.696969688 | gi 11342666  | matrix metalloproteinase 2 preproprotein [Homo sapiens]         | 2             |

**P0-OA alone**

| N  | Unused | Total | %Cov        | %Cov(50)    | %Cov(95)    | Accession #  | Name of the protein                                                                 | Peptides(95%) |
|----|--------|-------|-------------|-------------|-------------|--------------|-------------------------------------------------------------------------------------|---------------|
| 1  | 27.19  | 27.19 | 86.01756692 | 21.15666121 | 18.88726205 | gi 48762934  | alpha 2 type I collagen [Homo sapiens]                                              | 15            |
| 2  | 11.04  | 11.04 | 23.17596525 | 5.236051604 | 3.562231734 | gi 47132555  | fibronectin 1 isoform 4 preproprotein [Homo sapiens]                                | 5             |
| 3  | 9.96   | 9.96  | 46.30541801 | 10.67323461 | 7.224959135 | gi 4502027   | albumin precursor [Homo sapiens]                                                    | 5             |
| 4  | 7.67   | 7.67  | 69.74043846 | 4.98633869  | 4.98633869  | gi 110349772 | alpha 1 type I collagen preproprotein [Homo sapiens]                                | 5             |
| 6  | 5.03   | 5.03  | 53.03643942 | 19.43319887 | 19.43319887 | gi 169217813 | PREDICTED: hypothetical protein [Homo sapiens]                                      | 3             |
| 7  | 4.77   | 4.77  | 32.97872245 | 17.37588644 | 12.41134778 | gi 4504619   | insulin-like growth factor binding protein 7 [Homo sapiens]                         | 2             |
| 8  | 4.33   | 4.33  | 18.77394617 | 2.159526385 | 1.671891287 | gi 24430141  | fibrillin 1 precursor [Homo sapiens]                                                | 2             |
| 9  | 4      | 4     | 46.21409774 | 8.877284825 | 8.877284825 | gi 144226251 | chitinase 3-like 1 [Homo sapiens]                                                   | 2             |
| 10 | 3.6    | 3.6   | 36.9168371  | 7.302231342 | 7.302231342 | gi 9665262   | EGF-containing fibulin-like extracellular matrix protein 1 precursor [Homo sapiens] | 3             |

**P1-OA alone**

| N  | Unused | Total | %Cov        | %Cov(50)    | %Cov(95)    | Accession #  | Name of the protein                                                     | Peptides(95%) |
|----|--------|-------|-------------|-------------|-------------|--------------|-------------------------------------------------------------------------|---------------|
| 1  | 23.19  | 23.19 | 82.78688788 | 17.89617538 | 13.45628351 | gi 110349772 | alpha 1 type I collagen preproprotein [Homo sapiens]                    | 14            |
| 2  | 20.63  | 20.63 | 76.57393813 | 16.83748215 | 14.20204937 | gi 48762934  | alpha 2 type I collagen [Homo sapiens]                                  | 12            |
| 3  | 15.87  | 15.87 | 30.84376156 | 6.136455387 | 4.36011292  | gi 47132557  | fibronectin 1 isoform 1 preproprotein [Homo sapiens]                    | 7             |
| 5  | 8.45   | 8.45  | 25.04353821 | 2.995472029 | 2.36851275  | gi 24430141  | fibrillin 1 precursor [Homo sapiens]                                    | 4             |
| 6  | 6.27   | 6.27  | 47.85100222 | 6.303724647 | 6.303724647 | gi 4557871   | transferrin [Homo sapiens]                                              | 3             |
| 8  | 5.54   | 5.54  | 71.75324559 | 16.23376608 | 9.740259498 | gi 5901956   | follicle-stimulating hormone receptor-like 1 precursor [Homo sapiens]   | 2             |
| 10 | 4.04   | 4.04  | 45.03546059 | 12.41134778 | 12.41134778 | gi 4504619   | insulin-like growth factor binding protein 7 [Homo sapiens]             | 2             |
| 12 | 4      | 4     | 14.44261372 | 2.251510136 | 2.251510136 | gi 4557733   | latent transforming growth factor beta binding protein 2 [Homo sapiens] | 2             |
| 13 | 3.65   | 3.65  | 33.8516742  | 7.296650857 | 1.67464111  | gi 5453834   | periostin, osteoblast specific factor [Homo sapiens]                    | 1             |
| 14 | 3.34   | 3.34  | 49.39271212 | 19.43319887 | 7.28744939  | gi 169217813 | PREDICTED: hypothetical protein [Homo sapiens]                          | 2             |

P0 OA-P4 hMSC co-culture

| N  | Unused | Total | %Cov        | %Cov(50)    | %Cov(95)    | Accession #  | Name of the protein                                                                        | Peptides(95%) |
|----|--------|-------|-------------|-------------|-------------|--------------|--------------------------------------------------------------------------------------------|---------------|
| 1  | 41.37  | 41.37 | 86.45680547 | 31.47877157 | 26.93997025 | gi 48762934  | alpha 2 type I collagen [Homo sapiens]                                                     | 23            |
| 2  | 28.13  | 28.13 | 77.868855   | 16.87158495 | 16.87158495 | gi 110349772 | alpha 1 type I collagen preproprotein [Homo sapiens]                                       | 19            |
| 3  | 16.43  | 16.43 | 33.60514939 | 7.811158895 | 5.493562296 | gi 47132555  | fibronectin 1 isoform 4 preproprotein [Homo sapiens]                                       | 7             |
| 5  | 7.73   | 7.73  | 68.72852445 | 29.20962274 | 18.21305901 | gi 62243068  | insulin-like growth factor binding protein 3 isoform b precursor [Homo sapiens]            | 3             |
| 5  | 0      | 7.73  | 59.93266106 | 28.61952782 | 17.84511805 | gi 62243248  | insulin-like growth factor binding protein 3 isoform a precursor [Homo sapiens]            | 3             |
| 6  | 7.61   | 7.61  | 41.54351354 | 11.16584539 | 5.418719351 | gi 4502027   | albumin precursor [Homo sapiens]                                                           | 3             |
| 7  | 6.49   | 6.49  | 39.94082808 | 16.86390489 | 13.60946745 | gi 4505047   | lumican precursor [Homo sapiens]                                                           | 3             |
| 8  | 5.72   | 5.72  | 74.87922907 | 34.78260934 | 17.87439585 | gi 4507509   | tissue inhibitor of metalloproteinase 1 precursor [Homo sapiens]                           | 2             |
| 9  | 4.87   | 4.87  | 29.0780127  | 18.4397161  | 12.41134778 | gi 4504619   | insulin-like growth factor binding protein 7 [Homo sapiens]                                | 2             |
| 11 | 4.37   | 4.37  | 22.18739092 | 1.706722379 | 1.393242739 | gi 24430141  | fibrillin 1 precursor [Homo sapiens]                                                       | 3             |
| 12 | 4      | 4     | 43.45991611 | 8.227848262 | 8.227848262 | gi 32483410  | vitamin D-binding protein precursor [Homo sapiens]                                         | 3             |
| 14 | 3.77   | 3.77  | 45.3441292  | 19.43319887 | 12.14574873 | gi 169217813 | PREDICTED: hypothetical protein [Homo sapiens]                                             | 2             |
| 15 | 3.4    | 3.41  | 69.30422783 | 2.864938602 | 2.864938602 | gi 4502951   | collagen, type III, alpha 1 preproprotein [Homo sapiens]                                   | 2             |
| 16 | 3.15   | 3.15  | 38.79310489 | 4.956896603 | 2.58620698  | gi 4502261   | serine (or cysteine) proteinase inhibitor, clade C (antithrombin), member 1 [Homo sapiens] | 1             |
| 17 | 2.8    | 2.8   | 17.16738194 | 4.72103022  | 2.145922743 | gi 62414289  | vimentin [Homo sapiens]                                                                    | 1             |
| 18 | 2.49   | 2.49  | 15.27093649 | 5.090311915 | 3.776682913 | gi 4501989   | alpha-fetoprotein precursor [Homo sapiens]                                                 | 4             |
| 34 | 1.4    | 1.4   | 69.04761791 | 11.90476194 | 11.90476194 | gi 28173554  | histone cluster 3, H2bb [Homo sapiens]                                                     | 1             |
|    | 0      | 1.4   | 30.95238209 | 11.90476194 | 11.90476194 | gi 4504259   | histone cluster 1, H2bl [Homo sapiens]                                                     | 1             |
|    | 0      | 1.4   | 42.06349254 | 11.90476194 | 11.90476194 | gi 4504277   | histone cluster 2, H2be [Homo sapiens]                                                     | 1             |
|    | 0      | 1.4   | 42.06349254 | 11.90476194 | 11.90476194 | gi 4504271   | histone cluster 1, H2bi [Homo sapiens]                                                     | 1             |
|    | 0      | 1.4   | 42.06349254 | 11.90476194 | 11.90476194 | gi 4504265   | histone cluster 1, H2bf [Homo sapiens]                                                     | 1             |
|    | 0      | 1.4   | 43.65079403 | 11.90476194 | 11.90476194 | gi 4504263   | histone cluster 1, H2bm [Homo sapiens]                                                     | 1             |
|    | 0      | 1.4   | 42.06349254 | 11.90476194 | 11.90476194 | gi 4504257   | histone cluster 1, H2bg [Homo sapiens]                                                     | 1             |
|    | 0      | 1.4   | 42.06349254 | 11.90476194 | 11.90476194 | gi 21396484  | histone cluster 1, H2be [Homo sapiens]                                                     | 1             |
|    | 0      | 1.4   | 42.06349254 | 11.90476194 | 11.90476194 | gi 21166389  | histone cluster 1, H2bc [Homo sapiens]                                                     | 1             |
|    | 0      | 1.4   | 42.06349254 | 11.90476194 | 11.90476194 | gi 20336754  | histone cluster 1, H2bj [Homo sapiens]                                                     | 1             |
|    | 0      | 1.4   | 34.92063582 | 11.90476194 | 11.90476194 | gi 20336752  | histone cluster 1, H2bd [Homo sapiens]                                                     | 1             |
|    | 0      | 1.4   | 42.06349254 | 11.90476194 | 11.90476194 | gi 18105048  | histone cluster 1, H2bk [Homo sapiens]                                                     | 1             |
|    | 0      | 1.4   | 32.53968358 | 11.90476194 | 11.90476194 | gi 10800140  | histone cluster 1, H2bb [Homo sapiens]                                                     | 1             |
|    | 0      | 1.4   | 34.92063582 | 11.90476194 | 11.90476194 | gi 10800138  | histone cluster 1, H2bd [Homo sapiens]                                                     | 1             |
|    | 0      | 1.4   | 20.6349209  | 11.90476194 | 11.90476194 | gi 66912162  | histone cluster 2, H2bf [Homo sapiens]                                                     | 1             |
|    | 0      | 1.4   | 20.6349209  | 11.90476194 | 11.90476194 | gi 4504269   | histone cluster 1, H2bh [Homo sapiens]                                                     | 1             |
|    | 0      | 1.4   | 20.6349209  | 11.90476194 | 11.90476194 | gi 4504261   | histone cluster 1, H2bn [Homo sapiens]                                                     | 1             |
|    | 0      | 1.4   | 20.6349209  | 11.90476194 | 11.90476194 | gi 16306566  | histone cluster 1, H2bo [Homo sapiens]                                                     | 1             |
| 21 | 2.17   | 2.17  | 88.46153617 | 21.53846174 | 6.923077255 | gi 4504249   | histone cluster 1, H2am [Homo sapiens]                                                     | 1             |
|    | 0      | 2.17  | 88.46153617 | 21.53846174 | 6.923077255 | gi 4504243   | histone cluster 1, H2al [Homo sapiens]                                                     | 1             |

|   |      |             |             |             |              |                                                             |   |
|---|------|-------------|-------------|-------------|--------------|-------------------------------------------------------------|---|
| 0 | 2.17 | 88.46153617 | 21.53846174 | 6.923077255 | gi 4504241   | histone cluster 1, H2ak [Homo sapiens]                      | 1 |
| 0 | 2.17 | 88.46153617 | 21.53846174 | 6.923077255 | gi 4504239   | histone cluster 1, H2ai [Homo sapiens]                      | 1 |
| 0 | 2.17 | 89.84375    | 21.875      | 7.03125     | gi 18105045  | histone cluster 1, H2ah [Homo sapiens]                      | 1 |
| 0 | 2.17 | 89.84375    | 21.875      | 7.03125     | gi 10800144  | histone cluster 1, H2aj [Homo sapiens]                      | 1 |
| 0 | 2.17 | 88.46153617 | 21.53846174 | 6.923077255 | gi 10800132  | histone cluster 1, H2ag [Homo sapiens]                      | 1 |
| 0 | 2.17 | 69.99999881 | 21.53846174 | 6.923077255 | gi 4504251   | histone cluster 2, H2aa3 [Homo sapiens]                     | 1 |
| 0 | 2.17 | 86.92307472 | 21.53846174 | 6.923077255 | gi 28195394  | histone cluster 2, H2ab [Homo sapiens]                      | 1 |
| 0 | 2.17 | 70.54263353 | 21.70542628 | 6.976744533 | gi 24638446  | histone cluster 2, H2ac [Homo sapiens]                      | 1 |
| 0 | 2.17 | 69.23077106 | 21.53846174 | 6.923077255 | gi 10800130  | histone cluster 1, H2ad [Homo sapiens]                      | 1 |
| 0 | 2.17 | 69.99999881 | 21.53846174 | 6.923077255 | gi 106775678 | histone cluster 2, H2aa4 [Homo sapiens]                     | 1 |
| 0 | 2.17 | 79.23076749 | 21.53846174 | 6.923077255 | gi 4504245   | histone cluster 1, H2ac [Homo sapiens]                      | 1 |
| 0 | 2.17 | 73.64341021 | 21.70542628 | 6.976744533 | gi 29553970  | H2A histone family, member J [Homo sapiens]                 | 1 |
| 0 | 2.17 | 90.83969593 | 21.37404531 | 6.870228797 | gi 25092737  | histone cluster 1, H2aa [Homo sapiens]                      | 1 |
| 0 | 2.17 | 66.15384817 | 21.53846174 | 6.923077255 | gi 19557656  | histone cluster 1, H2ab [Homo sapiens]                      | 1 |
| 0 | 2.17 | 66.15384817 | 21.53846174 | 6.923077255 | gi 10645195  | histone cluster 1, H2ae [Homo sapiens]                      | 1 |
| 0 | 2.17 | 62.2377634  | 19.58041936 | 6.293706596 | gi 4504253   | H2A histone family, member X [Homo sapiens]                 | 1 |
| 0 | 2.17 | 56.92307949 | 21.53846174 | 6.923077255 | gi 15617199  | histone cluster 3, H2a [Homo sapiens]                       | 1 |
| 0 | 1.4  | 34.88371968 | 5.232558027 | 5.232558027 | gi 113425815 | PREDICTED: similar to Histone H2AV (H2A.F/Z) [Homo sapiens] | 1 |
| 0 | 1.4  | 41.86046422 | 5.232558027 | 5.232558027 | gi 169209156 | PREDICTED: similar to Histone H2AV (H2A.F/Z) [Homo sapiens] | 1 |
| 0 | 1.4  | 54.6875     | 7.03125     | 7.03125     | gi 6912616   | H2A histone family, member V isoform 1 [Homo sapiens]       | 1 |
| 0 | 1.4  | 43.75       | 7.03125     | 7.03125     | gi 4504255   | H2A histone family, member Z [Homo sapiens]                 | 1 |
| 0 | 1.4  | 61.40350699 | 7.894736528 | 7.894736528 | gi 20357599  | H2A histone family, member V isoform 2 [Homo sapiens]       | 1 |
| 0 | 1.4  | 80.30303121 | 13.63636404 | 13.63636404 | gi 41406069  | H2A histone family, member V isoform 4 [Homo sapiens]       | 1 |
| 0 | 1.4  | 21.09375    | 7.03125     | 7.03125     | gi 41205618  | PREDICTED: similar to Histone H2AV (H2A.F/Z) [Homo sapiens] | 1 |

**P1 OA-P4 hMSC co-culture**

| N  | Unused | Total | %Cov        | %Cov(50)    | %Cov(95)    | Accession #  | Name of the protein                                                     | Peptides(95%) |
|----|--------|-------|-------------|-------------|-------------|--------------|-------------------------------------------------------------------------|---------------|
| 1  | 72.18  | 72.18 | 92.75256395 | 51.46412849 | 43.92386675 | gi 48762934  | alpha 2 type I collagen [Homo sapiens]                                  | 47            |
| 2  | 64.11  | 64.11 | 91.12021923 | 47.88251221 | 37.70491779 | gi 110349772 | alpha 1 type I collagen preproprotein [Homo sapiens]                    | 46            |
| 3  | 51.28  | 51.28 | 45.3078568  | 20.33970207 | 19.32059377 | gi 16933542  | fibronectin 1 isoform 3 preproprotein [Homo sapiens]                    | 25            |
| 4  | 28.19  | 28.19 | 31.87042773 | 9.961685538 | 7.105538249 | gi 24430141  | fibrillin 1 precursor [Homo sapiens]                                    | 12            |
| 5  | 14.9   | 14.9  | 34.92822945 | 15.66985697 | 11.48325354 | gi 5453834   | periostin, osteoblast specific factor [Homo sapiens]                    | 7             |
| 6  | 14.65  | 14.65 | 79.18424606 | 24.89451468 | 19.5499301  | gi 126352446 | elastin isoform d [Homo sapiens]                                        | 7             |
| 7  | 12.92  | 12.92 | 54.4554472  | 35.64356565 | 25.08250773 | gi 4507171   | secreted protein, acidic, cysteine-rich [Homo sapiens]                  | 6             |
| 9  | 11.69  | 11.69 | 23.50356877 | 6.699615717 | 4.173531011 | gi 4557733   | latent transforming growth factor beta binding protein 2 [Homo sapiens] | 5             |
| 10 | 11.52  | 11.52 | 56.38297796 | 38.65248263 | 38.65248263 | gi 4504619   | insulin-like growth factor binding protein 7 [Homo sapiens]             | 6             |
| 11 | 7.52   | 7.52  | 72.94685841 | 50.72463751 | 27.53623128 | gi 4507509   | tissue inhibitor of metalloproteinase 1 precursor [Homo sapiens]        | 3             |
| 12 | 6.77   | 6.77  | 35.30377746 | 6.732348353 | 4.761904851 | gi 4502027   | albumin precursor [Homo sapiens]                                        | 3             |
| 13 | 6.18   | 6.18  | 44.41260695 | 13.18051517 | 13.18051517 | gi 4503123   | connective tissue growth factor [Homo sapiens]                          | 3             |

|    |      |      |             |             |             |              |                                                                                 |   |
|----|------|------|-------------|-------------|-------------|--------------|---------------------------------------------------------------------------------|---|
| 14 | 6    | 6    | 27.69230902 | 4.358974472 | 4.358974472 | gi 40317626  | thrombospondin 1 precursor [Homo sapiens]                                       | 3 |
| 15 | 5.75 | 5.75 | 80.32021523 | 5.470313504 | 2.868579142 | gi 89363017  | alpha 2 type V collagen preproprotein [Homo sapiens]                            | 2 |
| 16 | 5.32 | 5.32 | 44.41260695 | 7.879655808 | 4.29799445  | gi 4557871   | transferrin [Homo sapiens]                                                      | 2 |
| 17 | 4.91 | 4.91 | 46.75324559 | 18.50649416 | 12.33766228 | gi 5901956   | folliculin-like 1 precursor [Homo sapiens]                                      | 2 |
| 18 | 4.72 | 4.72 | 62.54295707 | 17.18213111 | 14.08934742 | gi 62243068  | insulin-like growth factor binding protein 3 isoform b precursor [Homo sapiens] | 2 |
| 19 | 4.53 | 4.53 | 55.19765615 | 6.881405413 | 5.124450848 | gi 4507467   | transforming growth factor, beta-induced, 68kDa [Homo sapiens]                  | 2 |
| 21 | 4.12 | 4.12 | 69.80413198 | 2.121871524 | 2.121871524 | gi 89276751  | alpha 1 type V collagen preproprotein [Homo sapiens]                            | 2 |
| 22 | 4.12 | 4.12 | 77.76262164 | 4.297408089 | 0.818553846 | gi 4502951   | collagen, type III, alpha 1 preproprotein [Homo sapiens]                        | 2 |
| 23 | 4.12 | 4.12 | 54.65586782 | 19.43319887 | 19.43319887 | gi 169217813 | PREDICTED: hypothetical protein [Homo sapiens]                                  | 3 |
| 24 | 4.11 | 4.11 | 33.43195319 | 9.467455745 | 9.467455745 | gi 4505047   | lumican precursor [Homo sapiens]                                                | 2 |
| 25 | 4.02 | 4.02 | 16.24834836 | 4.88771461  | 4.88771461  | gi 40217843  | cartilage oligomeric matrix protein precursor [Homo sapiens]                    | 2 |
| 27 | 4    | 4    | 44.09090877 | 19.54545528 | 19.54545528 | gi 4507511   | TIMP metalloproteinase inhibitor 2 precursor [Homo sapiens]                     | 2 |
| 28 | 3.52 | 3.52 | 37.85310686 | 12.71186471 | 12.71186471 | gi 4503053   | hyaluronan and proteoglycan link protein 1 [Homo sapiens]                       | 2 |
| 29 | 3.44 | 3.44 | 30.09950221 | 6.467662007 | 6.467662007 | gi 10835159  | plasminogen activator inhibitor-1 [Homo sapiens]                                | 2 |

| <b>Key</b>      |                                                                                                                                                                                              |
|-----------------|----------------------------------------------------------------------------------------------------------------------------------------------------------------------------------------------|
| <b>Category</b> | <b>Definition</b>                                                                                                                                                                            |
| N               | The rank of the specified protein relative to all other proteins in the list of detected proteins.                                                                                           |
| Unused          | A measure of the protein confidence for a detected protein, calculated from the peptide confidence for peptides from spectra that have not been completely “used” by higher scoring proteins |
| Total           | A measure of the total amount of evidence for a detected protein. The Total ProtScore does not indicate the percent confidence for the identification of a protein.                          |
| %Cov            | The percentage of matching amino acids from identified peptides having Confidence greater than 0 divided by the total number of amino acids in the sequence.                                 |
| %Cov(50)        | The percentage of matching amino acids from identified peptides having Confidence greater than or equal to 50 divided by the total number of amino acids in the sequence.                    |
| %Cov(95)        | The percentage of matching amino acids from identified peptides having Confidence greater than or equal to 95 divided by the total number of amino acids in the sequence.                    |
